# Supplementary material for: Carcinoma-associated fibroblasts promoted tumor spheroid invasion on a microfluidic 3D co-culture device
Source: Royal Society of Chemistry journal article supplement (doi:10.1039/c000022a), 2010-01-01

### Legends of supplemental figure

**Supplemental Fig 1.** Expression of  $\alpha$ -SMA in CAFs and HFL1 cells by immunofluorescent staining. (a) Positive expression of  $\alpha$ -SMA in CAFs. (b) Negative expression of  $\alpha$ -SMA in HFL1 cells. Scale bar = 100  $\mu$ m

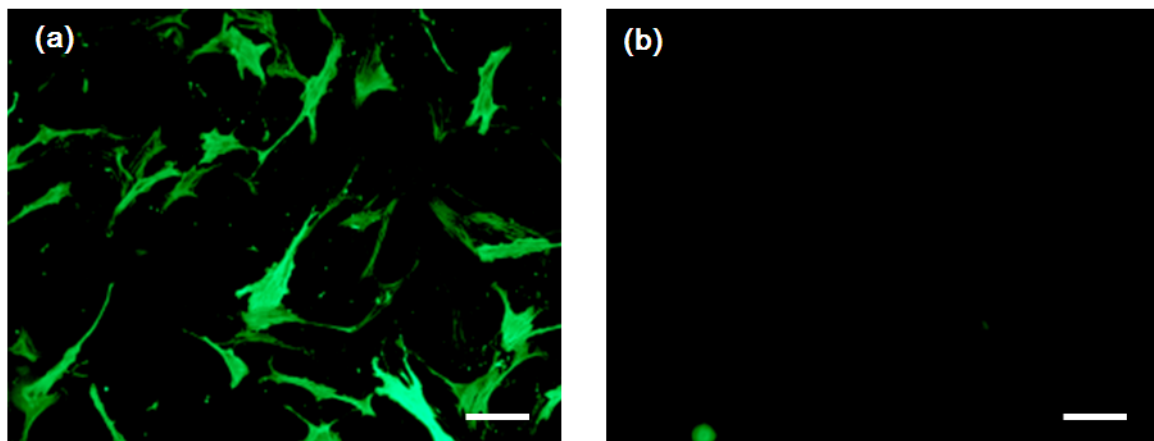

Supplement: c000022a.pdf [file c000022a.pdf]
